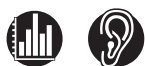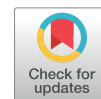

# Effect of Changing Work Stressors and Coping Resources on the Risk of Type 2 Diabetes: The OHSPIW Cohort Study

Yulong Lian,<sup>1,2</sup> Qing Sun,<sup>1</sup> Suzhen Guan,<sup>2</sup>  
Hua Ge,<sup>2</sup> Ning Tao,<sup>2</sup> Yu Jiang,<sup>2</sup>  
Yanxia Zhang,<sup>2</sup> Li Ning,<sup>2</sup> Jing Xiao,<sup>1</sup>  
and Jiwen Liu<sup>2</sup>

*Diabetes Care* 2018;41:453–460 | <https://doi.org/10.2337/dc17-0749>

## OBJECTIVE

Little is known about the relationship between changing psychosocial work conditions and type 2 diabetes. We determined whether changing work stressors and coping resources affect the risk of type 2 diabetes.

## RESEARCH DESIGN AND METHODS

In this prospective cohort (2003–2014) of 3,740 workers without diabetes (OHSPIW [Occupational Health Study of Petroleum Industry Workers]), participants completed an evaluation of work-related stress and coping resources and type 2 diabetes diagnosis at baseline and 12 years follow-up (two waves). The changes in work stressors and coping resources were measured with the Occupation Stress Inventory–Revised and the Instrument for Stress-Related Job Analysis (Version 6.0). Type 2 diabetes was diagnosed on the basis of an oral glucose tolerance test supplemented by physician report.

## RESULTS

Increased task stressors (relative risk [RR] 1.57 [95% CI 1.03–2.63]) and decreased coping resources (RR 1.68 [95% CI 1.02–2.83]) were associated with risk of type 2 diabetes. The main risk factors were increased role overload, increased role insufficiency, increased physical environment stressors, decreased self-care, and decreased rational coping. Increased coping resources also had a buffering effect on increased task stressors and type 2 diabetes.

## CONCLUSIONS

Changes in work stressors and coping resources have an influence on the risk for type 2 diabetes, highlighting the importance of preventive measures against adverse psychosocial work conditions and reduced coping resources for diabetes prevention in the workplace.

Diabetes is a growing problem that poses a major public health challenge globally (1), and the epidemic is particularly notable in China (2). Diabetes may account for up to 20% of national health care budgets in some countries (3). To date, the focus of preventive efforts has been on lifestyle and pharmacological interventions (4); however, interest in the role the psychosocial work environment plays in the onset of type 2 diabetes, including job strain (5–12), occupational stressors (13), workload (14), job insecurity (15), and justice at work (16), has been growing. Evidence of a psychosocial work environment–diabetes association is limited and inconsistent (17,18). For

<sup>1</sup>Division of Occupational and Environmental Health, College of Public Health, Nantong University, Nantong, Jiangsu, China

<sup>2</sup>Division of Occupational and Environmental Health, College of Public Health, Xinjiang Medical University, Urumqi, Xinjiang, China

Corresponding author: Yulong Lian, [lianyulong444@163.com](mailto:lianyulong444@163.com).

Received 12 April 2017 and accepted 20 November 2017.

This article contains Supplementary Data online at <http://care.diabetesjournals.org/lookup/suppl/doi:10.2337/dc17-0749/-/DC1>.

This article is featured in a podcast available at <http://www.diabetesjournals.org/content/diabetes-core-update-podcasts>.

© 2017 by the American Diabetes Association. Readers may use this article as long as the work is properly cited, the use is educational and not for profit, and the work is not altered. More information is available at <http://www.diabetesjournals.org/content/license>.

example, no association between job strain on the basis of the demand latitude model (19) and diabetes was found in the Nurses' Health Study II (NHS II) (8), the Canadian Community Health Survey (CCHS) (7), and Japanese studies (10), whereas Whitehall II (6), the Augsburg studies (5), and the Individual-Participant Data Meta-analysis of Working Populations (IPD-Work) consortium studies (11) have reported that job strain is a risk for diabetes. In addition, a sex difference in effect was found in Whitehall II and the Stockholm Diabetes Prevention Program (SDPP) (12) but not in the IPD-Work study.

These inconsistent findings may result from methodological limitations, such as various means of confirming the diagnosis of type 2 diabetes (self-report [5,6,8,11], hospital registries [11], physician report [7], and oral glucose tolerance tests [6,10–12]), and not adjusting for important confounding factors, such as mental health (5,6,8,10) and various exposure assessments among studies (dichotomous [5,6,11], tertiary [12], and quadrantal [10] categorization). Moreover, all previous studies only assessed exposure at baseline and may have under- or overestimated the true effect of the psychosocial work environment on the risk of diabetes if psychosocial work factors are relatively unstable (11).

In addition to these work-related psychosocial factors, psychosocial resources, such as social support (20), self-care (21), and social network (22), have been shown to be associated with type 2 diabetes. The effect of workplace psychosocial factors on diabetes may be influenced by coping resources. In the Whitehall II study, job strain was associated with a 60% higher risk for type 2 diabetes, and isostrain was associated with a twofold higher risk (6); however, the effect of coping resources was not found in one recent Chinese cohort study (13). Thus, the synergistic interaction effect on type 2 diabetes is poorly understood and does not provide evidence that changing these factors would result in changes in the risk of type 2 diabetes.

The petroleum industry plays an important role in driving the global economy and makes the identification of factors that influence the health of personnel who work in this industry essential (23). Previous findings showed that petroleum industry workers report more

psychosocial stressors and health problems (23,24), but knowledge is still lacking about the factors that cause diabetes in this occupational setting. From both an organizational and a public policy perspective, knowledge about changes in these conditions is associated with a subsequent risk for type 2 diabetes, which could have important implications for prevention. In addition, the aforementioned studies have focused primarily on adverse changes in psychosocial working conditions, and type 2 diabetes might be reduced by promoting favorable changes instead of merely preventing adverse changes.

In the current 12-year prospective study, we evaluated whether changes in work stressors, including task stressors, organization stressors, job control, and coping resources, were significantly associated with type 2 diabetes among Chinese petroleum industry workers. In addition, we evaluated the potential modifying effects of coping resources in the workplace.

## RESEARCH DESIGN AND METHODS

### Study Design and Participants

This study was part of the OHSPIW (Occupational Health Study of Petroleum Industry Workers), which investigated the effects of occupational risk factors

on health (24). The baseline data collection was performed between January and December 2003. A total of 4,500 workers were invited to participate, and 4,251 (94.5%) responded to the initial clinical examination, which included fasting blood glucose testing and questionnaires about medically diagnosed diseases, sociodemographic factors, lifestyle factors, work stressors, coping resources, and psychological distress. We excluded 521 workers with diabetes ( $n = 267$ ), pregnancy ( $n = 19$ ), cardiovascular disease ( $n = 113$ ), long-term sick leave ( $n = 34$ ), and unemployment or career change ( $n = 88$ ). We invited all respondents to participate in a follow-up interview (between January and December 2014) about work stressors, coping resources, and diagnosis of type 2 diabetes. In the follow-up, 239 participants were excluded as a result of insufficient or missing information about psychological work factors ( $n = 125$ ), retirement ( $n = 19$ ), moving out of the city ( $n = 9$ ), declining further participation ( $n = 61$ ), and unemployment or career change ( $n = 25$ ). Thus, the final sample comprised 3,740 participants (Fig. 1). The research protocol for this cohort study was approved by the ethics committee of Xinjiang Medical University. Written informed consent was obtained from all participants.

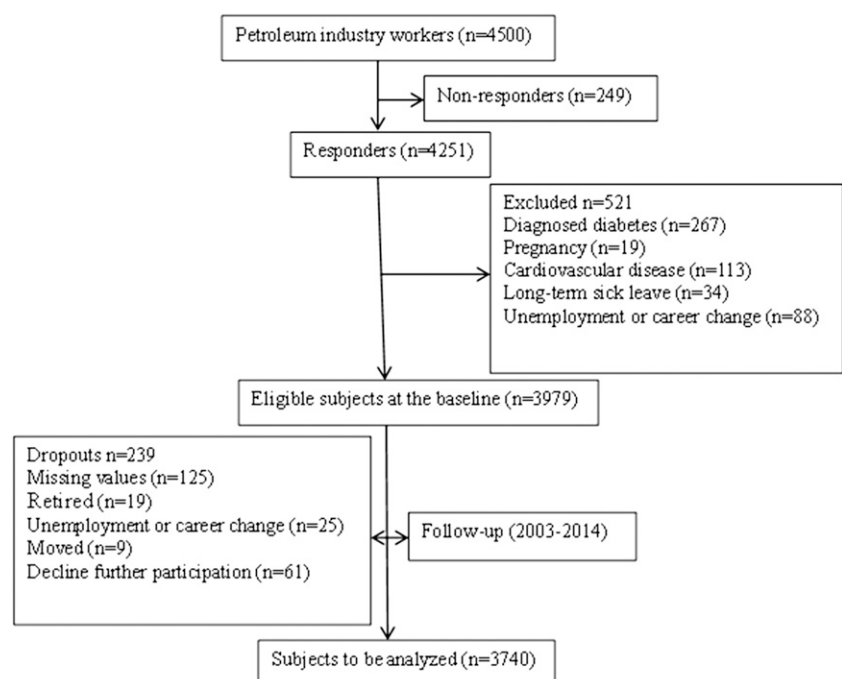

Figure 1—Flow of included and excluded individuals in the cohort study, 2003–2014.

## Measures

### Confirmation of Diagnosis of Type 2 Diabetes

The diagnosis of type 2 diabetes was made according to World Health Organization criteria (25) at baseline and China guidelines for type 2 diabetes at follow-up (fasting glucose  $\geq 7.0$  mmol/L and/or 2-h postload glucose  $\geq 11.1$  mmol/L) (26). We used the World Health Organization diagnostic criteria at baseline because the analytic cohort preceded the first China guidelines for type 2 diabetes. For participants without a prior diabetes diagnosis, venous blood samples were obtained from those who fasted 8 h, and individuals with a fasting plasma glucose  $> 6.1$  mmol/L were invited for a standard 2-h 75-g oral glucose tolerance test the next day. For participants with a clinical diagnosis of type 2 diabetes and/or use of diabetic medication between 2004 and 2013, medical records were reviewed by an endocrinologist blinded to patient information. On the basis of the China guidelines for type 2 diabetes, the diagnosis was confirmed in 26 of 26 (100%) participants. Eighty-five participants with type 2 diabetes were identified.

### Work Stressors

Work stressors included task stressors, job control, and organization stressors. Task stressors were measured by using the occupational role subscales from the Chinese version of the Occupational Stress Inventory–Revised (OSI-R) (27) originally developed by Osipow (28). The OSI-R is a reliable and valid method for measuring work stressors in China (24,28). The subscales assessed role overload, role insufficiency, role ambiguity, role boundary, responsibility, and physical environment, with each item scored on a Likert scale ranging from 1 (never) to 5 (always). Role overload measures the extent to which the demands of a job exceed resources and the degree to which the individual is able to complete the workload. Role insufficiency measures the degree to which an individual's training, education, skills, and experience are appropriate to the job requirements. Role ambiguity defines the extent to which the expected priorities, expectations, and evaluation criteria are clear to the employee, whereas role boundary analyzes conflicting role demands and loyalties in the work setting. Responsibility is measured by how responsible the individual feels for the

performance and welfare of his or her colleagues. Physical environment measures the degree to which the individual is exposed to high levels of environmental toxins or extreme physical conditions. Each subscale contains 10 items, and the item scores for each scale were summed. The scale scores were then summed to generate the total task stressor score as previously described (24,28). Higher scores indicated more task stressors.

Organizational stressors and job control were measured by using a stress-oriented job analysis questionnaire (Instrument for Stress-Related Job Analysis [Version 6.0]), which was originally developed in Germany (29) and has since been validated in the Chinese population (30). Job control includes task control, time control, participation, communication possibilities, and cooperation possibilities. Task control reflects the ability of employees to independently plan and organize their own work. Time control evaluates the influence of employees on their workplace and schedule. Participation measures the ability of employees to control their own work situation. Communication possibilities assess the possibility for work-related communications among colleagues, whereas cooperation possibilities address the possibilities for colleagues to support one another. Organizational stressors include organizational problems, work interruptions, closeness of cooperation, concentration requirements, and accident risk. Organizational problems were defined as dealing with inadequate devices or obsolete information. Work interruptions were defined as unexpected events caused by other employees, technical problems, and organizational problems. Concentration requirements reflect the need for a high level of concentration for prolonged periods. Closeness of cooperation and cooperation requirements are related to dependence on others and the need for mutual decisions and information. Accident risk addresses the safety of the work environment and the quality of safety instructions and accident prevention. Organizational stressor and job control scores were summed for each scale as previously recommended (24,29). Higher scores indicated a higher level of work-related psychosocial factors (27).

### Coping Resources

Coping resources were measured by using the personal strain subscales from the

Chinese version of the OSI-R (27). High scores indicated highly developed coping resources, including recreation, self-care, social support, and rational coping. Recreation evaluates the individual's ability to derive pleasure and relaxation. Self-care measures the extent to which the individual regularly engages in stress-relieving activities. Social support measures the degree of support perceived by the individual. Rational coping evaluates an individual's ability to apply cognitive skills to work-related stress. The scale scores were summed to generate the total coping resources score as previously described (24,27).

### Changes in Work Stressors and Coping Resources

Changes in work stressors and coping resources were assessed by classifying changes greater than the minimal detectable change as described by Jacobson and Truax (31). This method incorporates both the observed variance in scores at baseline and an estimate of day-to-day variability in the measures. The day-to-day variability of a measure is estimated by test–retest reliability. Estimations of the day-to-day variability for each work stressor and coping resource were established on the basis of baseline and follow-up OSI-R and Instrument for Stress-Related Job Analysis (Version 6.0) scores of 100 manufacturing workers over a 2-week period, with coefficients ranging from 0.86 to 0.96 as previously recommended (24,31). Change was defined according to the minimal detectable change value (increased change, greater than the upper limited value; decreased change, lower than the lower limited value).

### Covariates

Data on several potential confounding factors were collected at baseline, including sociodemographic variables, lifestyle factors, family history of diabetes, and psychological distress. Self-report educational level was classified as secondary school or less, college, and university. BMI was classified as underweight ( $< 18.5$  kg/m<sup>2</sup>), normal weight (18.5–23.0 kg/m<sup>2</sup>), and overweight (23.0–27.5 kg/m<sup>2</sup>). Family history of diabetes was determined on the basis of the following question: Were any of your biological relatives, that is, blood relatives, including grandparents, parents, uncles, aunts, brothers, and sisters, ever told by a health professional that they had diabetes? Smoking status

was categorized as smoker (at least one cigarette per day), occasional smoker (fewer than one cigarette per day), ex-smoker, and nonsmoker. Alcohol consumption was quantified by the grams of alcohol consumed weekly as beer, wine, and hard liquor and divided into the following four categories: alcohol consumer ( $>8$  g/week), occasional consumer ( $<8$  g/week), ex-consumer, and nonconsumer. Physical activities were classified into four groups (three or more times per week, fewer than three times a week, irregular, and never) on the basis of the following questions: Do you engage in vigorous physical activity at work or at home or for training purposes? How many times in a normal week do you engage in vigorous physical activities? Psychological distress was assessed at baseline by using the Chinese Symptom Checklist-90-Revised (cases, global severity index  $\geq 63$ ) (32). At the baseline and follow-up evaluations, participants reported their medically diagnosed chronic diseases and were categorized as having no disease or one or more diseases. Full details of these variables are published elsewhere (24).

### Statistical Analyses

Descriptive statistics were calculated for demographic variables compared between included and excluded workers by using Student *t* and  $\chi^2$  tests. With the use of no change as the reference group, the relationship between type 2 diabetes and a change in work stressors and coping resources and their components was analyzed by multiple logistic regression modeling controlling for the effects of sex, ethnicity, age, education, marital status, and family history of diabetes (model 1) and additionally for smoking, BMI, physical activity, alcohol consumption, psychological distress, chronic diseases, and changes in work stressors (for coping strategies as a main variable) or coping resources (for work stressors as a main variable) (model 2). Given that the effect of the psychosocial work environment on diabetes may have sex divergence (6,12), analyses were performed for men and women combined and separately. To evaluate whether the associations differed between men and women, the likelihood ratio test was used to measure interactions between psychosocial work stress variables and sex. Furthermore, the modifying effects of coping resources

were evaluated by stratified analysis adjusting for the above-mentioned confounding factors. SPSS version 17.0 software (IBM Corporation, Chicago, IL) was used for the statistical analyses.

### RESULTS

The group of excluded workers was less educated than the group of included participants. The prevalence of a family history of diabetes and women was also higher in excluded workers. We did not observe differences in age, ethnicity, physical activity,

smoking, alcohol consumption, BMI, and marital status (Table 1).

Increased task stressors and decreased coping resources were significantly associated with incident type 2 diabetes. Neither changes in organization stressors nor a change in job control was associated with type 2 diabetes. No difference in the association between changes in work stressors and coping resources and incident type 2 diabetes was observed for males and females (*P* for sex interaction  $> 0.05$ ) (Table 2). Because of no sex differences in the

**Table 1—Characteristics at baseline among participants included and excluded from the analyses**

| Characteristic             | Included ( <i>n</i> = 3,740) | Excluded ( <i>n</i> = 760) | <i>P</i> value |
|----------------------------|------------------------------|----------------------------|----------------|
| Age (years), mean (SD)     | 38.3 (8.1)                   | 38.9 (7.2)                 | 0.172          |
| Sex                        |                              |                            | 0.0004         |
| Male                       | 2,019 (54.0)                 | 357 (47.0)                 |                |
| Female                     | 1,721 (46.0)                 | 403 (53.0)                 |                |
| Ethnicity                  |                              |                            | 0.061          |
| Han                        | 3,163 (84.6)                 | 636 (83.7)                 |                |
| Uyghur                     | 378 (10.1)                   | 68 (8.9)                   |                |
| Other                      | 199 (5.3)                    | 56 (7.4)                   |                |
| Education                  |                              |                            | 0.0001         |
| Secondary school or less   | 1,026 (27.4)                 | 250 (32.9)                 |                |
| College                    | 1,989 (53.2)                 | 406 (53.4)                 |                |
| University                 | 725 (19.4)                   | 104 (13.7)                 |                |
| Physical activity          |                              |                            | 0.287          |
| Never                      | 832 (22.2)                   | 189 (24.9)                 |                |
| $<3$ times/week            | 1,326 (35.5)                 | 254 (33.4)                 |                |
| $\geq 3$ times/week        | 724 (19.4)                   | 135 (17.8)                 |                |
| Irregular                  | 858 (22.9)                   | 182 (23.9)                 |                |
| Psychological distress     |                              |                            | 0.316          |
| Yes                        | 1,074 (28.7)                 | 232 (30.5)                 |                |
| No                         | 2,666 (71.3)                 | 528 (69.5)                 |                |
| Family history of diabetes | 597 (16.0)                   | 152 (20.0)                 | 0.006          |
| Smoking status             |                              |                            | 0.067          |
| Regular smoker             | 683 (18.3)                   | 121 (15.9)                 |                |
| Nonsmoker                  | 1,753 (46.9)                 | 387 (50.9)                 |                |
| Occasional smoker          | 720 (19.3)                   | 153 (20.1)                 |                |
| Ex-smoker                  | 584 (15.6)                   | 99 (13.0)                  |                |
| Alcohol consumption        |                              |                            | 0.106          |
| Nonconsumer                | 1,415 (37.8)                 | 300 (39.5)                 |                |
| Consumer                   | 392 (10.5)                   | 60 (7.9)                   |                |
| Occasional consumer        | 1,350 (36.1)                 | 291 (38.3)                 |                |
| Ex-consumer                | 583 (15.6)                   | 109 (14.3)                 |                |
| BMI                        |                              |                            | 0.158          |
| Normal weight              | 2,885 (77.1)                 | 556 (73.1)                 |                |
| Underweight                | 22 (0.6)                     | 4 (0.5)                    |                |
| Overweight                 | 191 (5.1)                    | 42 (5.5)                   |                |
| Moderately obese           | 585 (15.6)                   | 144 (18.9)                 |                |
| Severely obese             | 57 (1.5)                     | 15 (2.0)                   |                |
| Marital status             |                              |                            | 0.053          |
| Single                     | 539 (14.4)                   | 123 (16.2)                 |                |
| Married                    | 2,821 (75.4)                 | 566 (74.5)                 |                |
| Divorced                   | 322 (8.6)                    | 59 (7.8)                   |                |
| Widowed                    | 20 (0.5)                     | 0 (0)                      |                |
| Remarried                  | 38 (1.0)                     | 12 (1.6)                   |                |

Data are *n* (%) unless otherwise indicated.

**Table 2—Type 2 diabetes by changes of work stressors and coping resources adjusted for covariates compared with no change**

| Factor                 | Proportion  | Model 1 |           | Model 2 |           | Model 2 (men) |           | Model 2 (women) |           | P value for sex interaction |
|------------------------|-------------|---------|-----------|---------|-----------|---------------|-----------|-----------------|-----------|-----------------------------|
|                        |             | RR      | 95% CI    | RR      | 95% CI    | RR            | 95% CI    | RR              | 95% CI    |                             |
| Task stressors         |             |         |           |         |           |               |           |                 |           |                             |
| Decrease               | 18 of 812   | 1.45    | 0.82–1.42 | 1.23    | 0.78–1.46 | 1.21          | 0.71–1.67 | 1.32            | 0.82–2.08 | 0.231                       |
| Increase               | 38 of 1,190 | 1.61*   | 1.25–2.86 | 1.42*   | 1.13–2.53 | 1.36*         | 1.01–2.37 | 1.21*           | 1.02–2.14 | 0.124                       |
| Organization stressors |             |         |           |         |           |               |           |                 |           |                             |
| Decrease               | 28 of 1,103 | 0.81    | 0.52–1.33 | 0.87    | 0.55–1.36 | 0.87          | 0.63–1.86 | 0.85            | 0.57–1.77 | 0.467                       |
| Increase               | 15 of 608   | 1.36    | 0.78–2.12 | 1.23    | 0.76–2.02 | 1.22          | 0.71–2.15 | 1.26            | 0.88–2.12 | 0.348                       |
| Job control            |             |         |           |         |           |               |           |                 |           |                             |
| Decrease               | 18 of 799   | 0.81    | 0.68–1.32 | 0.76    | 0.48–1.54 | 0.86          | 0.44–1.62 | 0.78            | 0.51–1.34 | 0.556                       |
| Increase               | 16 of 733   | 0.88    | 0.51–1.56 | 0.89    | 0.50–1.52 | 0.74          | 0.56–1.25 | 0.67            | 0.42–1.62 | 0.327                       |
| Coping resources       |             |         |           |         |           |               |           |                 |           |                             |
| Decrease               | 11 of 758   | 1.69*   | 1.12–2.91 | 1.68*   | 1.09–2.76 | 1.74*         | 1.03–2.79 | 1.82*           | 1.08–3.23 | 0.109                       |
| Increase               | 34 of 1,032 | 1.13    | 0.71–2.01 | 1.15    | 0.64–1.88 | 0.98          | 0.52–1.61 | 1.09            | 0.61–1.94 | 0.239                       |

Model 1 adjusted for sociodemographic variables (ethnicity, age, education, marital status) and family history of diabetes. Model 2 additionally adjusted for smoking, BMI, physical activity, alcohol consumption, chronic disease, psychological distress, and work stressors (for each coping strategy as a main variable) or coping resources (for each work stressor as a main variable). \* $P < 0.05$ .

effect, we combined men and women into one group for further analyses. We examined the changes in the components of work stressors and coping resources in relation to the risk for type 2 diabetes (Table 3). Participants with increased role overload, increased role insufficiency, or increased physical environment stressors were at an increased risk for type 2 diabetes, with relative risk (RR) values of 2.25 (95% CI 1.26–4.17), 1.73 (1.08–2.85), and 1.83 (1.10–3.01), respectively. In addition, an increased risk for type 2 diabetes existed with decreased self-care (2.06 [1.08–3.89]) and decreased rational coping (2.27 [1.14–4.28]). Again, the associations did not change after adjustment for lifestyle factors, psychological distress, and chronic disease.

On the basis of the findings on the independent effect of task stressors and coping resources on type 2 diabetes, we also analyzed the interaction between coping resources and task stressors on the risk for type 2 diabetes (Table 4). The presence of both increased task stressors and decreased coping resources increased the risk for type 2 diabetes by ~300% (RR 2.72 [95% CI 1.27–5.76]) compared with no change. Increased task stressors with decreased coping resources was not associated with a significantly increased risk of type 2 diabetes (1.06 [0.47–2.34]).

## CONCLUSIONS

This prospective study is the first to our knowledge to show that increased task stressors and/or decreased coping resources

place workers at a substantially higher risk for type 2 diabetes. Increased coping resources had a protective effect for increased task stressors on type 2 diabetes. The main risk factors were increased role overload, increased role insufficiency, increased physical environment stressors, decreased self-care, and decreased rational coping.

Evidence linking work-related stress to the risk of type 2 diabetes is conflicting (17,18). One Chinese study that was based on the same transactional model of stress showed that occupational stressors are associated with abnormal glucose metabolism (13). Although the current results cannot easily be compared with previous studies because of a difference in the measurement of exposure assessment (single vs. cumulative), we observed a similar effect of increased task stressors on the risk for type 2 diabetes; however, we did not find that positive changes in the psychosocial work factors reduced the risk for type 2 diabetes. In addition, a 3-month stress management intervention among U.S. Latinos with type 2 diabetes showed that each additional session resulted in a 0.21 decrease in HbA<sub>1c</sub> level (33). Therefore, our failure to find this positive effect suggests that the benefits of positively changing psychosocial work conditions may require that a strict and higher-intensity intervention be realized. Indeed, several studies have shown the effect of work-related stress on type 2 diabetes only in females (6,7,18), and the authors speculated that the different effect may be attributable to the roles often assumed

by females outside the workplace, such as household responsibilities and child care. However, these stressful life events related to social relationships and home life were reported to be unrelated to impaired glucose tolerance on the basis of the Botnia Study (34). In one IPD-Work study (11), sex divergence of the effect was not found. We also found support for this evidence through the observation of no sex difference in the relation. Our findings regarding the association between role overload/insufficiency and type 2 diabetes also confirmed a U-shaped relationship between workload and type 2 diabetes as reported by Toker et al. (14). Compared with medium workload, both under- and overworkload may increase the risk for diabetes. In a previous study, we found that the burden of a permanent negative workload was associated with an increase in blood pressure (24), and blood pressure has been closely related to abnormal glucose metabolism, which may then result in the development of type 2 diabetes (35). Another possible explanation is that adverse workload might reduce physical activity of workers during work hours and then influence the risk for type 2 diabetes. With respect to physical environment, epidemiology studies have demonstrated that exposure to physical environmental risk factors (e.g., noise, particulate matter) increases the risk for diabetes (36). We also found an effect of increased physical environment stressors on type 2 diabetes. However the assessment of physical environment was based on the



**Table 3—Type 2 diabetes by changes in components of work stressors and coping resources adjusted for covariates compared with no change**

|                             |             | Model 1 |           | Model 2 |           |
|-----------------------------|-------------|---------|-----------|---------|-----------|
| Factor                      | Proportion  | RR      | 95% CI    | RR      | 95% CI    |
| Task stressors              |             |         |           |         |           |
| Role overload               |             |         |           |         |           |
| Decrease                    | 28 of 1,163 | 1.21    | 0.79–2.28 | 1.14    | 0.86–1.90 |
| Increase                    | 18 of 463   | 2.25*   | 1.26–4.17 | 2.26*   | 1.20–4.01 |
| Role ambiguity              |             |         |           |         |           |
| Decrease                    | 22 of 927   | 1.59    | 0.91–2.79 | 1.42    | 0.83–2.46 |
| Increase                    | 31 of 1,148 | 1.58    | 0.90–2.62 | 1.56    | 0.92–2.60 |
| Responsibility              |             |         |           |         |           |
| Decrease                    | 30 of 1,139 | 1.50    | 0.90–2.50 | 1.46    | 0.88–2.41 |
| Increase                    | 21 of 844   | 1.37    | 0.79–2.40 | 1.31    | 0.76–2.30 |
| Role boundary               |             |         |           |         |           |
| Decrease                    | 18 of 766   | 1.35    | 0.78–2.41 | 1.35    | 0.75–2.42 |
| Increase                    | 34 of 1,135 | 1.41    | 0.85–2.31 | 1.30    | 0.76–2.14 |
| Role insufficiency          |             |         |           |         |           |
| Decrease                    | 20 of 780   | 1.07    | 0.59–2.08 | 1.08    | 0.58–1.94 |
| Increase                    | 36 of 1,189 | 1.73*   | 1.08–2.85 | 1.67*   | 1.03–2.72 |
| Physical environment        |             |         |           |         |           |
| Decrease                    | 23 of 872   | 1.39    | 0.76–2.42 | 1.36    | 0.78–2.41 |
| Increase                    | 27 of 1,072 | 1.83*   | 1.10–3.01 | 1.77*   | 1.02–2.88 |
| Organization stressors      |             |         |           |         |           |
| Organizational problems     |             |         |           |         |           |
| Decrease                    | 9 of 400    | 1.10    | 0.61–2.01 | 1.11    | 0.63–2.06 |
| Increase                    | 17 of 729   | 0.55    | 0.25–1.22 | 0.52    | 0.29–1.28 |
| Closeness of cooperation    |             |         |           |         |           |
| Decrease                    | 12 of 541   | 0.68    | 0.29–1.41 | 0.66    | 0.39–1.48 |
| Increase                    | 7 of 319    | 1.57    | 0.79–2.90 | 1.49    | 0.71–2.81 |
| Accident risk               |             |         |           |         |           |
| Decrease                    | 14 of 625   | 0.92    | 0.53–1.55 | 0.91    | 0.53–1.59 |
| Increase                    | 9 of 404    | 1.11    | 0.61–1.27 | 1.12    | 0.61–2.02 |
| Work interruptions          |             |         |           |         |           |
| Decrease                    | 13 of 579   | 0.90    | 0.52–1.56 | 0.89    | 0.54–1.55 |
| Increase                    | 7 of 307    | 1.48    | 0.87–2.55 | 1.54    | 0.55–0.99 |
| Job control                 |             |         |           |         |           |
| Task control                |             |         |           |         |           |
| Decrease                    | 10 of 447   | 0.87    | 0.51–1.72 | 0.95    | 0.51–1.79 |
| Increase                    | 7 of 331    | 1.23    | 0.57–2.23 | 1.15    | 0.58–2.17 |
| Participation               |             |         |           |         |           |
| Decrease                    | 13 of 570   | 1.10    | 0.64–1.85 | 1.08    | 0.64–1.85 |
| Increase                    | 12 of 531   | 1.02    | 0.58–1.84 | 1.03    | 0.46–1.83 |
| Time control                |             |         |           |         |           |
| Decrease                    | 11 of 472   | 0.61    | 0.31–1.23 | 0.61    | 0.32–1.23 |
| Increase                    | 12 of 496   | 1.15    | 0.56–2.43 | 1.16    | 0.55–2.45 |
| Communication possibilities |             |         |           |         |           |
| Decrease                    | 11 of 550   | 0.84    | 0.52–1.27 | 0.84    | 0.51–1.33 |
| Increase                    | 8 of 336    | 1.20    | 0.67–2.23 | 1.22    | 0.76–2.28 |
| Cooperation possibilities   |             |         |           |         |           |
| Decrease                    | 11 of 488   | 0.78    | 0.35–1.72 | 0.79    | 0.36–1.78 |
| Increase                    | 12 of 574   | 0.76    | 0.39–1.71 | 0.77    | 0.44–1.73 |
| Coping resources            |             |         |           |         |           |
| Recreation                  |             |         |           |         |           |
| Decrease                    | 4 of 182    | 1.72    | 0.72–4.08 | 1.68    | 0.78–3.90 |
| Increase                    | 17 of 745   | 1.57    | 0.93–2.61 | 1.60    | 0.92–2.61 |
| Self-care                   |             |         |           |         |           |
| Decrease                    | 10 of 300   | 2.06*   | 1.08–3.89 | 2.07*   | 1.07–3.79 |
| Increase                    | 9 of 325    | 1.21    | 0.57–2.57 | 1.23    | 0.58–2.52 |
| Social support              |             |         |           |         |           |
| Decrease                    | 4 of 167    | 1.80    | 0.82–1.06 | 1.81    | 0.79–4.20 |
| Increase                    | 4 of 179    | 0.56    | 0.34–2.32 | 0.58    | 0.24–2.07 |
| Rational coping             |             |         |           |         |           |
| Decrease                    | 8 of 238    | 2.27*   | 1.14–4.28 | 2.29*   | 1.14–4.04 |
| Increase                    | 4 of 176    | 1.10    | 0.54–2.70 | 1.18    | 0.48–2.07 |

Model 1 adjusted for sociodemographic variables (ethnicity, age, education, marital status) and family history of diabetes. Model 2 additionally adjusted for smoking, BMI, physical activity, alcohol consumption, chronic disease, psychological distress, and work stressors (for each coping strategy as a main variable) or coping resources (for each work stressor as a main variable). \* $P < 0.05$ .

OSI-R, and more-objective measures of physical environments are needed to validate our conclusions.

We found no association between changes in job control and type 2 diabetes, which is consistent with findings by most previous studies (6,7,18) but inconsistent with the Västerbotten Intervention Program (VIP) (9) and SDPP (12). These two studies associated low job control with an elevated risk for diabetes among women. The divergence may be due to methodological differences in the assessment of job control. Previous studies were based on a demand-control model (19), whereas our assessment was based on a transactional model of stress extended to work psychology (27). Another explanation may be a result of the high dropout rate in SDPP and small sample size of VIP. In addition, we focused on work-related changes, whereas the previous studies did not consider these in the work environment. In VIP and SDPP, job control was assumed to be relatively stable during long-term follow-up. In considering the rapid progress of the petroleum industry, these studies may have over- or underestimated the true effect of job control on the risk for type 2 diabetes, and the effect has been confirmed in studies of cerebrovascular disease (37). We found no relationship between organization stressors and type 2 diabetes, which is in partially accords with findings from the Whitehall II study (16) that suggested that a high level of justice at work is related to reduced HDL cholesterol, elevated triglycerides, a large waist circumference, and elevated blood pressure but not with elevated glucose. Ideally, the observed reduced risks of diabetes result in a low-risk for diabetes, but such an effect was not found in our study.

We also have found that decreased coping resources increased the risk for type 2 diabetes but not for positive change, which disagrees with a Chinese cohort study (13). This divergence may be explained by the fact that we focused on type 2 diabetes occurring within 12 years of the change in coping resources, whereas the previous study examined type 2 diabetes in 4-year postbaseline coping resources (13). In addition, the association may be divergence among various types of coping resources. One review showed that self-care activities were associated with improved glycemic control (21). A previous meta-analysis has

**Table 4—Moderating effects of coping resources on the relationships of work stressors and diabetes adjusted for covariates**

| Factor                            | Model 1           | Model 2           |
|-----------------------------------|-------------------|-------------------|
| Task stressors × coping resources |                   |                   |
| No change × no change             | 1.00              | 1.00              |
| Increase × decrease               | 2.75 (1.25–5.09)* | 2.72 (1.27–5.76)* |
| Increase × increase               | 1.04 (0.48–2.45)  | 1.06 (0.47–2.34)  |

Data are RR (95% CI). Model 1 adjusted for sex, ethnicity, age, education, family history of diabetes, and marital status. Model 2 additionally adjusted for smoking, BMI, physical activity, alcohol consumption, chronic diseases, and psychological distress. \* $P < 0.05$ .

proven that social support is not an important risk factor for type 2 diabetes (17). We also confirmed that decreased self-care and decreased rational coping are related to type 2 diabetes but not changes in social support and recreation. However, two other cohort studies showed a significant association between high social integration and poor structural social support and diabetes in men but not women (20,22). The discrepancies could be explained partly by the aforementioned various indices used to measure social support and how they were categorized. These inconsistent findings might point to poor use of social support on the basis of traditional Chinese culture. In China, the individual reflects on the family; thus, stressful events or any behavior that indicates a lack of self-control may produce shame and guilt. As a result, Chinese workers may be reluctant to accept social support when facing stressful events. Essentially, the change of social support did not change social support use. Fukunishi et al. (38) found that poor use of social support rather than the existence and perception of social support per se was correlated with deranged glucose tolerance. However, how various types of social support influence diabetes requires further investigation.

The important role coping resources play in the work stress-suicide relationship is of particular interest. Work-related psychosocial stress may increase the risk for type 2 diabetes through activation of the hypothalamus-pituitary-adrenal axis and the sympathetic nervous system, lead to the release of sympathetic hormones and glucocorticoids and then to increased hepatic glucose output, decreased insulin secretion, and insulin resistance (39); however, active and problem-focused coping strategies may have positive effects on physiological responses, particularly hypothalamus-pituitary-adrenal activity and the sympathetic nervous system

(40), which may reduce the risk for type 2 diabetes.

The current study has a number of strengths, including a prospective design, the control of most known confounders, a wide variety of psychosocial working conditions, elimination of day-to-day variability, and evaluation of coping resources. However, some limitations should be considered. Recall and reporting biases were possibly due to self-reported work characteristics. The study population comprised petroleum industry workers; thus, the results may not be generalizable to other populations. Although we assessed most known covariates, other risk factors such as dietary intake were not examined. Furthermore, because BMI and lifestyle factors and psychological distress were measured only at baseline, changes in these factors might have contributed to an under- or overestimation of the associations. We found some differences between participants and nonparticipants with regard to sex and family history of diabetes, but a nonsex difference in the effect of psychosocial work characteristics on diabetes was found. Thus, we believe that the selection bias is minimal. Finally, reverse causation remains a potential source of bias. The participants' health status may have affected their perceptions of stress. In this study, however, stratum analytics did not change the association (Supplementary Table 1), suggesting that reverse causation is likely to explain little, if any, of the observed association. Although we used well-established constructs, research has indicated that a more comprehensive assessment of the psychosocial work environment is needed (e.g., demand latitude model) (18,37). Most of these Chinese versions of instruments emerged after the 2003 survey of OHSPW. We will assess these psychosocial work environment measurements in a future follow-up study.

This study shows that increased task stressors and decreased coping resources are independently associated with type 2 diabetes. Increased coping resources buffer the negative effect of these factors on type 2 diabetes. These findings pinpoint the importance of effective preventive measures against adverse psychosocial work characteristics, especially regarding workload and physical environment in workplace diabetes prevention. Moreover, the findings suggest the importance of employers providing more coping resources, such as increased adherence to self-care and problem-focused coping strategies, to reduce the diabetes risk of employees who experience adverse work conditions in the petroleum industry.

**Acknowledgments.** The authors thank Weiguo Tan and staff at the Kelamayi Center for Disease Control and Prevention (Kelamayi, China) who were involved in the conduct of this study. The authors also thank all the study participants.

**Funding.** This work was supported by the National Natural Science Foundation of China (grant numbers 81260424, 81460489, and 81260425); Natural Science Foundation of Jiangsu Province, China (grant number BK20171256); and Science and Technology Program of Nantong, China (grant number 12015111).

**Duality of Interest.** No potential conflicts of interest relevant to this article were reported.

**Author Contributions.** Y.L., Q.S., S.G., H.G., N.T., Y.J., Y.Z., L.N., J.X., and J.L. contributed to conceptualizing the analysis, interpreting the results, and editing the manuscript. Y.L. and J.X. wrote the manuscript and analyzed data. Y.L. and J.L. designed the study and interpreted the data. Q.S., S.G., H.G., N.T., Y.J., Y.Z., and L.N. made substantial contributions to the acquisition of data. Y.L. is the guarantor of this work and, as such, had full access to all the data in the study and takes responsibility for the integrity of the data and the accuracy of the data analysis.

## References

1. World Health Organization. *Global Report on Diabetes*. Geneva, WHO Press, 2016
2. Bragg F, Holmes MV, Iona A, et al.; China Kadoorie Biobank Collaborative Group. Association between diabetes and cause-specific mortality in rural and urban areas of China. *JAMA* 2017;317:280–289
3. International Diabetes Federation. *IDF Diabetes Atlas*. 7th ed. Brussels, International Diabetes Federation, 2015
4. Bergman M. Pathophysiology of prediabetes and treatment implications for the prevention of type 2 diabetes mellitus. *Endocrine* 2013;43:504–513
5. Huth C, Thorand B, Baumert J, et al. Job strain as a risk factor for the onset of type 2 diabetes mellitus: findings from the MONICA/KORA Augsburg cohort study. *Psychosom Med* 2014;76:562–568

6. Heraclides A, Chandola T, Witte DR, Brunner EJ. Psychosocial stress at work doubles the risk of type 2 diabetes in middle-aged women: evidence from the Whitehall II study. *Diabetes Care* 2009;32:2230–2235
7. Smith PM, Glazier RH, Lu H, Mustard CA. The psychosocial work environment and incident diabetes in Ontario, Canada. *Occup Med (Lond)* 2012;62:413–419
8. Kroenke CH, Spiegelman D, Manson J, Schernhammer ES, Colditz GA, Kawachi I. Work characteristics and incidence of type 2 diabetes in women. *Am J Epidemiol* 2007;165:175–183
9. Norberg M, Stenlund H, Lindahl B, Andersson C, Eriksson JW, Weinehall L. Work stress and low emotional support is associated with increased risk of future type 2 diabetes in women. *Diabetes Res Clin Pract* 2007;76:368–377
10. Kawakami N, Araki S, Takatsuka N, Shimizu H, Ishibashi H. Overtime, psychosocial working conditions, and occurrence of non-insulin dependent diabetes mellitus in Japanese men. *J Epidemiol Community Health* 1999;53:359–363
11. Nyberg ST, Fransson EI, Heikkilä K, et al.; IPD-Work Consortium. Job strain as a risk factor for type 2 diabetes: a pooled analysis of 124,808 men and women. *Diabetes Care* 2014;37:2268–2275
12. Eriksson AK, van den Donk M, Hilding A, Östenson CG. Work stress, sense of coherence, and risk of type 2 diabetes in a prospective study of middle-aged Swedish men and women. *Diabetes Care* 2013;36:2683–2689
13. Yu H, Liu JC, Fan YJ, et al. Association between occupational stressors and type 2 diabetes among Chinese police officers: a 4-year follow-up study in Tianjin, China. *Int Arch Occup Environ Health* 2016;89:277–288
14. Toker S, Shirom A, Melamed S, Armon G. Work characteristics as predictors of diabetes incidence among apparently healthy employees. *J Occup Health Psychol* 2012;17:259–267
15. Ferrie JE, Virtanen M, Jokela M, et al.; IPD-Work Consortium. Job insecurity and risk of diabetes: a meta-analysis of individual participant data. *CMAJ* 2016;188:E447–E455
16. Gimeno D, Tabák AG, Ferrie JE, et al. Justice at work and metabolic syndrome: the Whitehall II study. *Occup Environ Med* 2010;67:256–262
17. Cosgrove MP, Sargeant LA, Caleyachetty R, Griffin SJ. Work-related stress and type 2 diabetes: systematic review and meta-analysis. *Occup Med (Lond)* 2012;62:167–173
18. Sui H, Sun N, Zhan L, Lu X, Chen T, Mao X. Association between work-related stress and risk for type 2 diabetes: a systematic review and meta-analysis of prospective cohort studies. *PLoS One* 2016;11:e0159978
19. Karasek RA. Job demands, job decision latitude, and mental strain: implications for job redesign. *Adm Sci Q* 1979;24:285–308
20. Altevors J, Lukaschek K, Baumert J, et al. Poor structural social support is associated with an increased risk of type 2 diabetes mellitus: findings from the MONICA/KORA Augsburg cohort study. *Diabet Med* 2016;33:47–54
21. Mayberry LS, Bergner EM, Chakkalakal RJ, Elasy TA, Osborn CY. Self-care disparities among adults with type 2 diabetes in the USA. *Curr Diab Rep* 2016;16:113
22. Hilding A, Shen C, Östenson CG. Social network and development of prediabetes and type 2 diabetes in middle-aged Swedish women and men. *Diabetes Res Clin Pract* 2015;107:166–177
23. Nielsen MB, Tvedt SD, Matthiesen SB. Prevalence and occupational predictors of psychological distress in the offshore petroleum industry: a prospective study. *Int Arch Occup Environ Health* 2013;86:875–885
24. Lian Y, Qi C, Tao N, et al. Changing work stressors and coping resources influence blood pressure and hypertension incidence in a large OHSPiW cohort. *J Hum Hypertens* 2017;31:313–319
25. World Health Organization. *Definition, Diagnosis and Classification of Diabetes Mellitus and Its Complications, Report of a WHO Consultation, Part 1: Diagnosis and Classification of Diabetes Mellitus*. Geneva, World Health Organization, 1999
26. Lu J, Weng J, Ji N, et al. China guideline for type 2 diabetes. *Diabetes Res Clin Pract* 2011;104:1–52
27. Jian LI, Lan Y, Wang Z. The test of occupational stress inventory, revised edition. *Chin J Ind Hyg Occup Dis* 2001;19:190–193
28. Osipow S. *Occupational Stress Inventory-Revised Edition (OSI-R): Professional Manual*. Odessa, FL, Psychological Assessment Resources, 1998
29. Norbert KS, Dieter Z, Dunckel H. *Instrument zur Stressbezogenen Arbeitsanalyse. Version 6.0. ISTA*. Zurich, vdf Hochschulverlag, 1998
30. Lian YL, Liu JW, Zhang C, et al. Assessment on reliability and validity of instrument for stress-related job analysis 6.0. *Chin J Ind Hyg Occup Dis* 2007;25:730–734
31. Jacobson NS, Truax P. Clinical significance: a statistical approach to defining meaningful change in psychotherapy research. *J Consult Clin Psychol* 1991;59:12–19
32. Chen SL, Li LJ. Re-testing reliability, validity and norm applicability of SCL-90. *Chin J N Ment Dis* 2003;29:323–327
33. Wagner JA, Bermudez-Millan A, Damio G, et al. A randomized, controlled trial of a stress management intervention for Latinos with type 2 diabetes delivered by community health workers: outcomes for psychological wellbeing, glycemic control, and cortisol. *Diabetes Res Clin Pract* 2016;120:162–170
34. Pyykkönen AJ, Räikkönen K, Tuomi T, Eriksson JG, Groop L, Isomaa B. Stressful life events and the metabolic syndrome: the Prevalence, Prediction and Prevention of Diabetes (PPP)-Botnia Study. *Diabetes Care* 2010;33:378–384
35. Horta BL, Loret de Mola C, Victora CG. Long-term consequences of breastfeeding on cholesterol, obesity, systolic blood pressure and type 2 diabetes: a systematic review and meta-analysis. *Acta Paediatr* 2015;104:30–37
36. Münzel T, Sørensen M, Gori T, et al. Environmental stressors and cardio-metabolic disease: part I—epidemiologic evidence supporting a role for noise and air pollution and effects of mitigation strategies. *Eur Heart J* 2017;38:550–556
37. Kivimäki M, Kawachi I. Work stress as a risk factor for cardiovascular disease. *Curr Cardiol Rep* 2015;17:630
38. Fukunishi I, Akimoto M, Horikawa N, Shirasaka K, Yamazaki T. Stress coping and social support in glucose tolerance abnormality. *J Psychosom Res* 1998;45:361–369
39. Chida Y, Steptoe A. Cortisol awakening response and psychosocial factors: a systematic review and meta-analysis. *Biol Psychol* 2009;80:265–278
40. de Boer SF, Buwalda B, Koolhaas JM. Untangling the neurobiology of coping styles in rodents: towards neural mechanisms underlying individual differences in disease susceptibility. *Neurosci Biobehav Rev* 2017;74:401–422
